# Supplementary material for: Multi-functional bis(alkynyl)gold(iii) N⁁C complexes with distinct mechanochromic luminescence and electroluminescence properties
Source: Royal Society of Chemistry journal article supplement (doi:10.1039/c7sc02410j), 2017-01-01
Supplement: c7sc02410j1.pdf [file c7sc02410j1.pdf]

# **Multi-Functional Bis(alkynyl)gold(III) N<sup>+</sup>C Complexes with Distinct Mechanochromic Luminescence and Electroluminescence Properties**

Ben Yiu-Wing Wong, Hok-Lai Wong, Yi-Chun Wong, Vonika Ka-Man Au, Mei-Yee  
Chan\* and Vivian Wing-Wah Yam\*

*Institute of Molecular Functional Materials [Area of Excellence Scheme, University  
Grants Committee (Hong Kong)] and Department of Chemistry, The University of  
Hong Kong, Pokfulam Road, Hong Kong (P. R. China)*

## **Supporting Information**

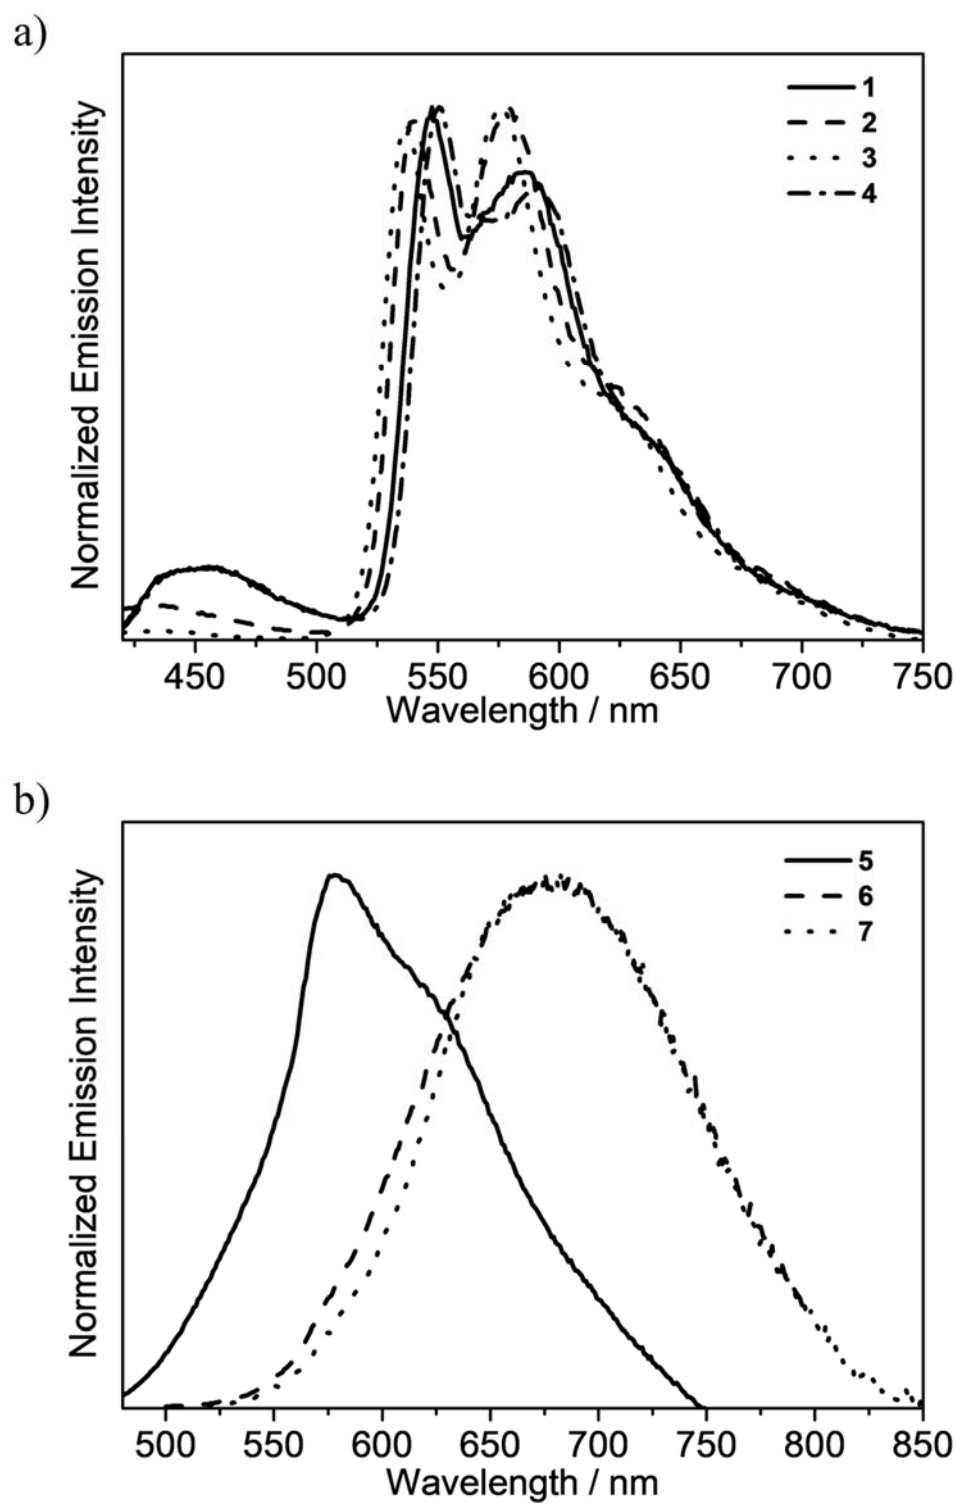

**Figure S1** Emission spectra of a) **1–4** and b) **5–7** in dichloromethane at 298 K.

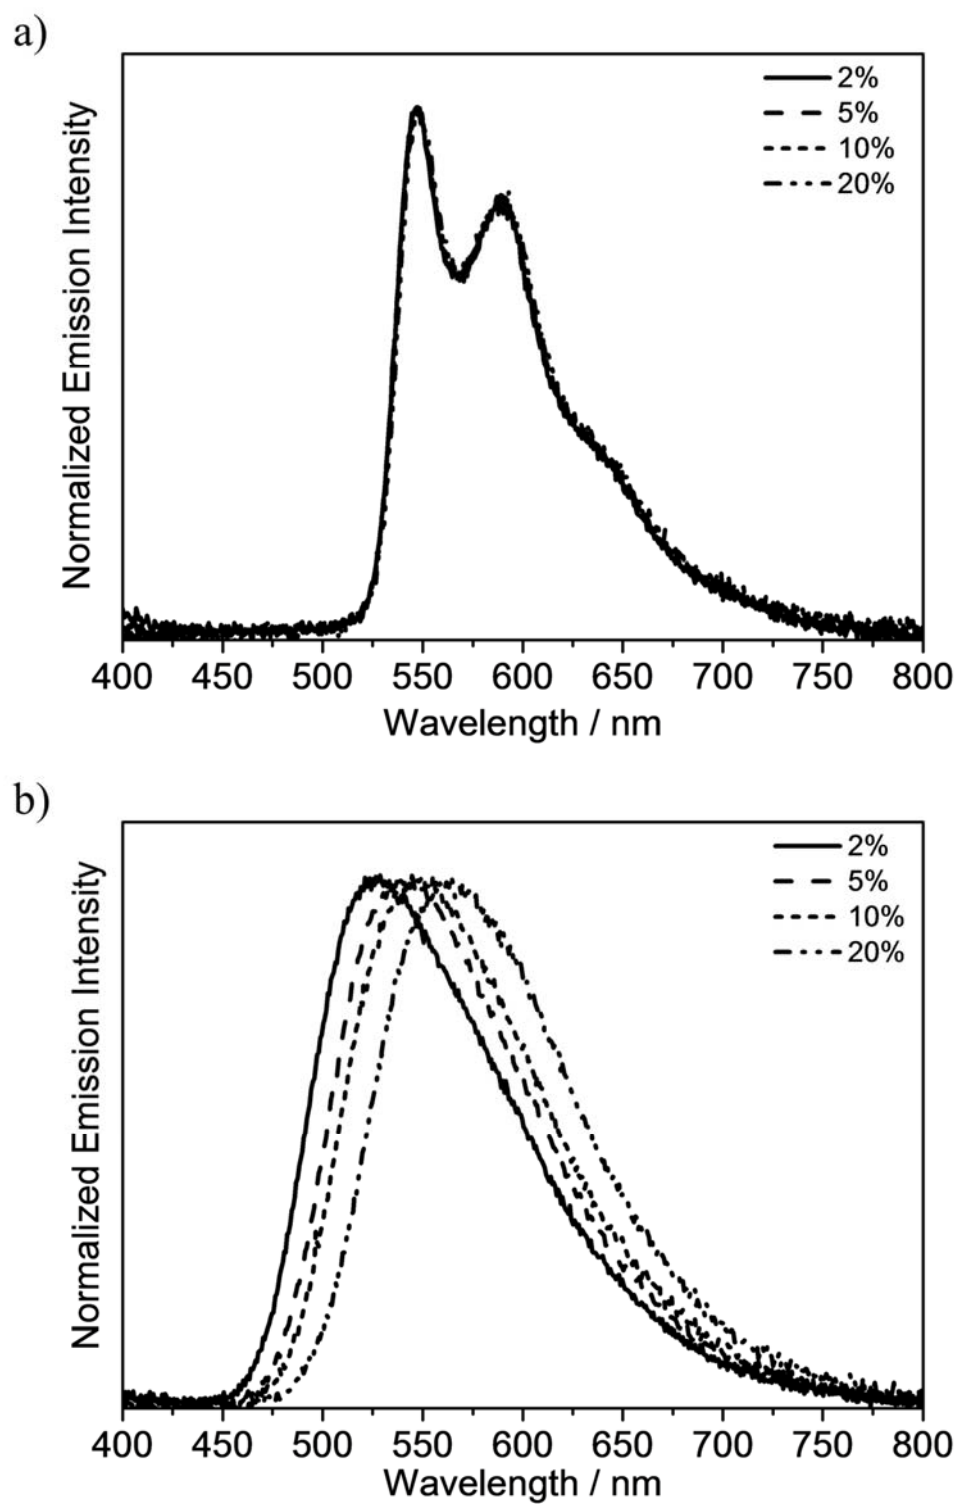

**Figure S2** Normalized emission spectra of a) **4** and b) **6** doped in MCP thin films at different concentrations at 298 K.

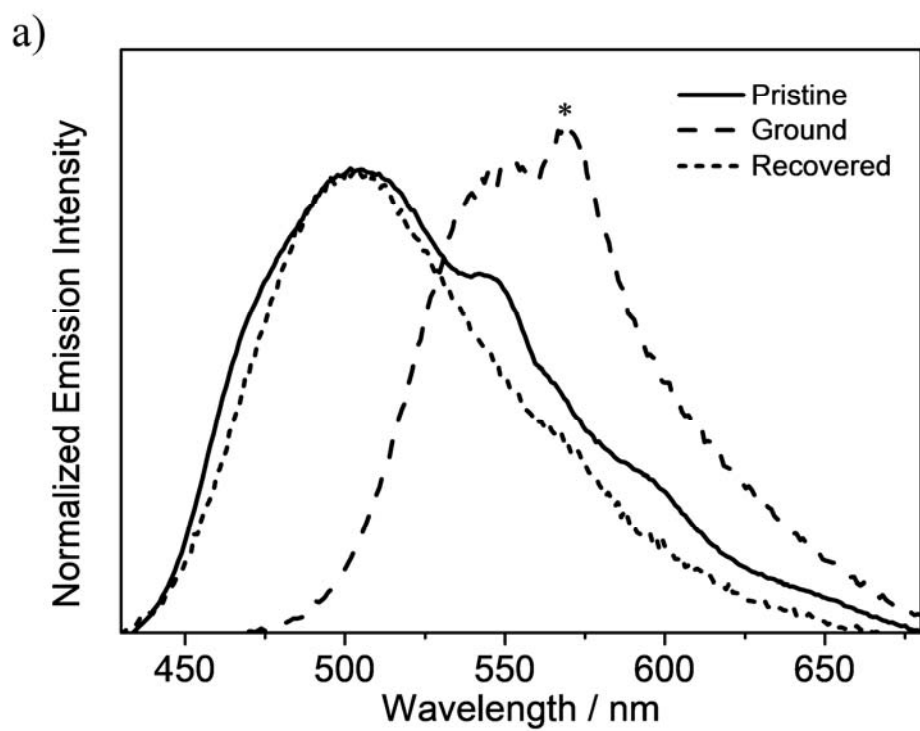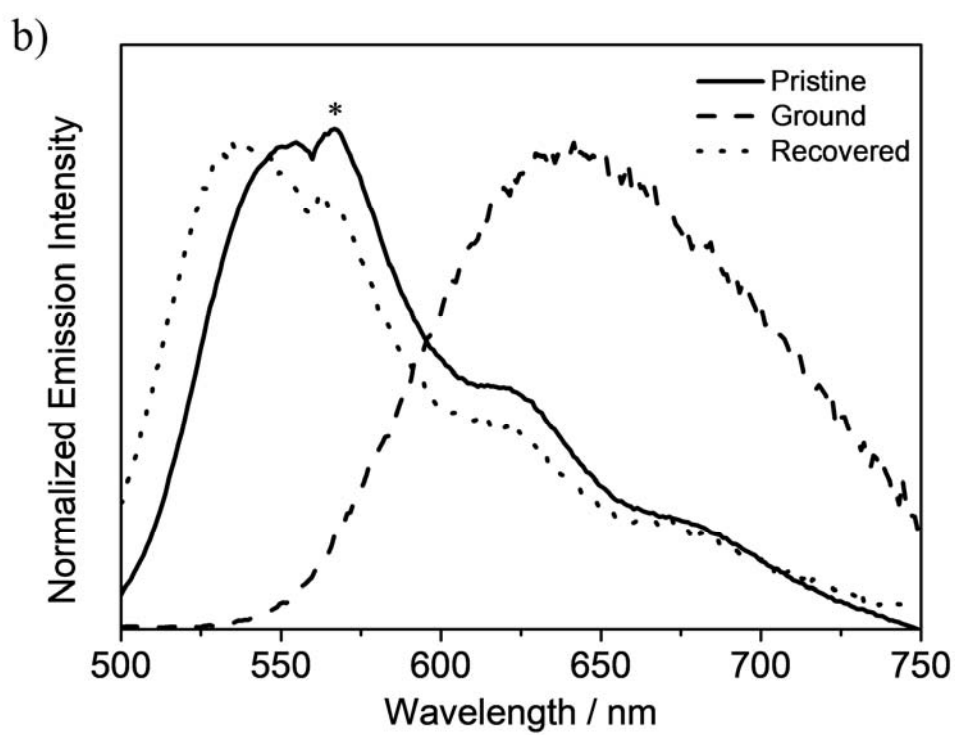

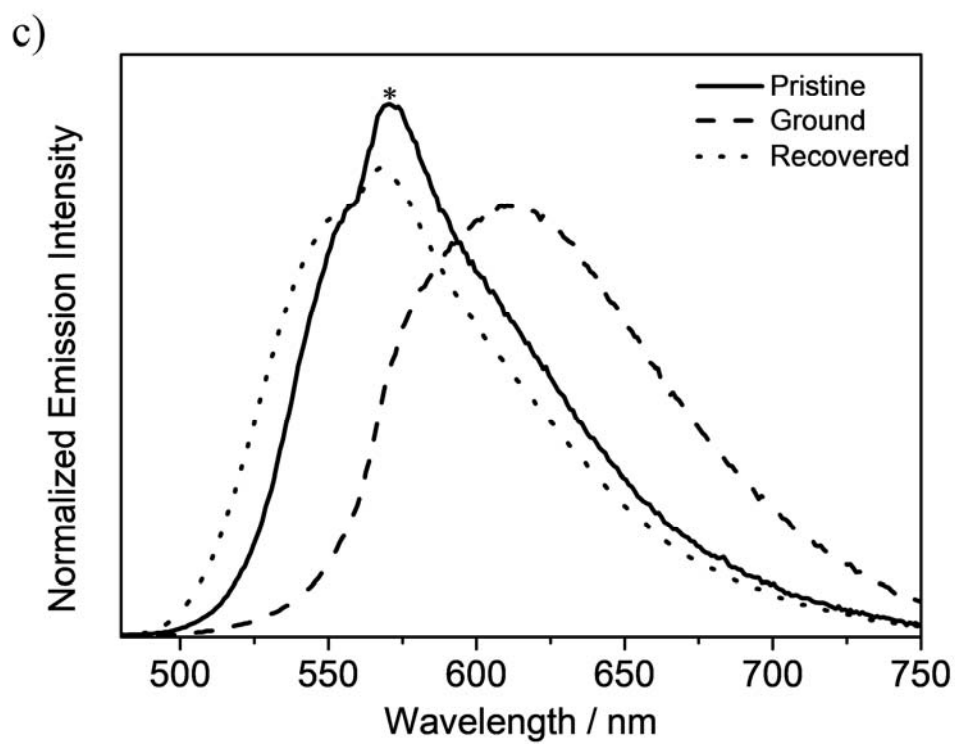

**Figure S3** Normalized emission spectra of a) **5**, a) **7** and c) **8** in pristine, ground and recovered forms (asterisk indicates an instrumental artifact).

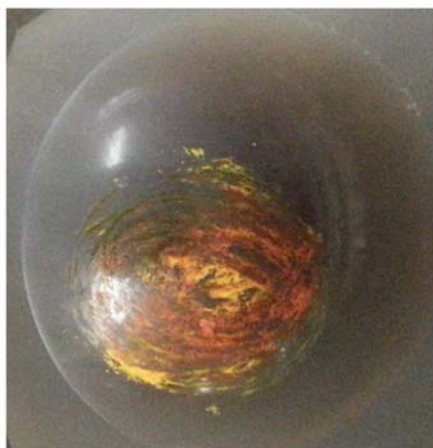

**Figure S4** Photographic image of **6** in response to mechanical grinding (red solid) under ambient light.

a)

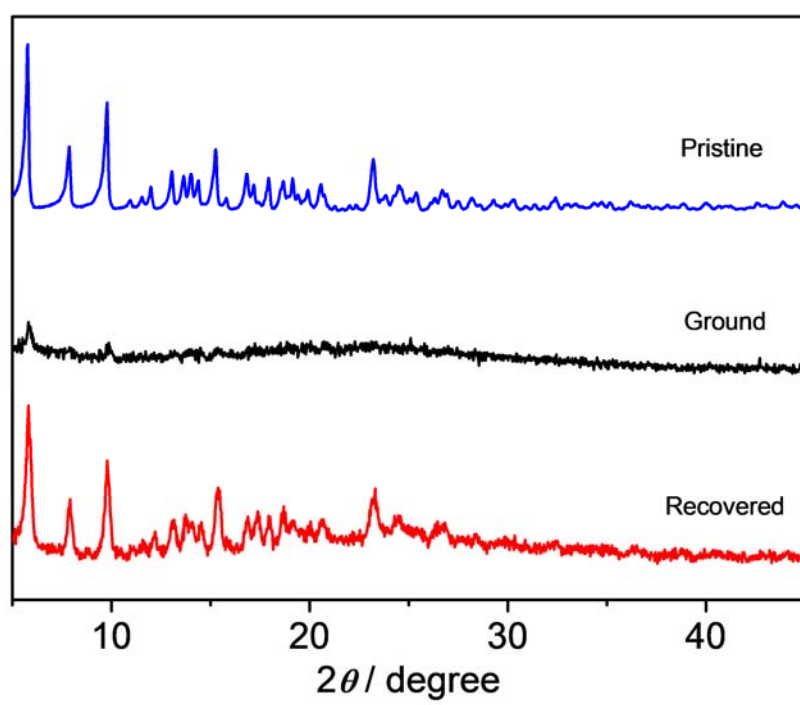

b)

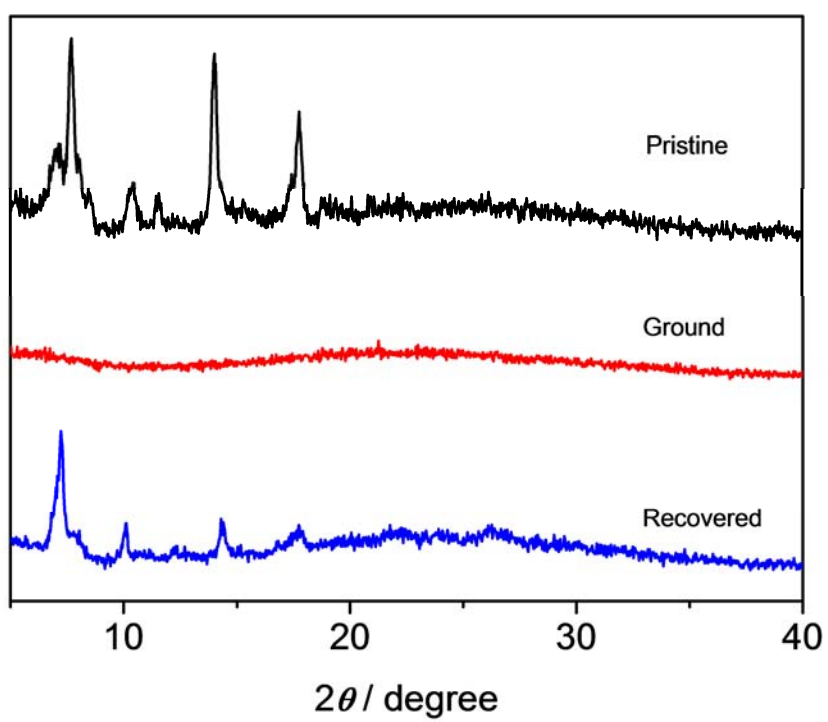

c)

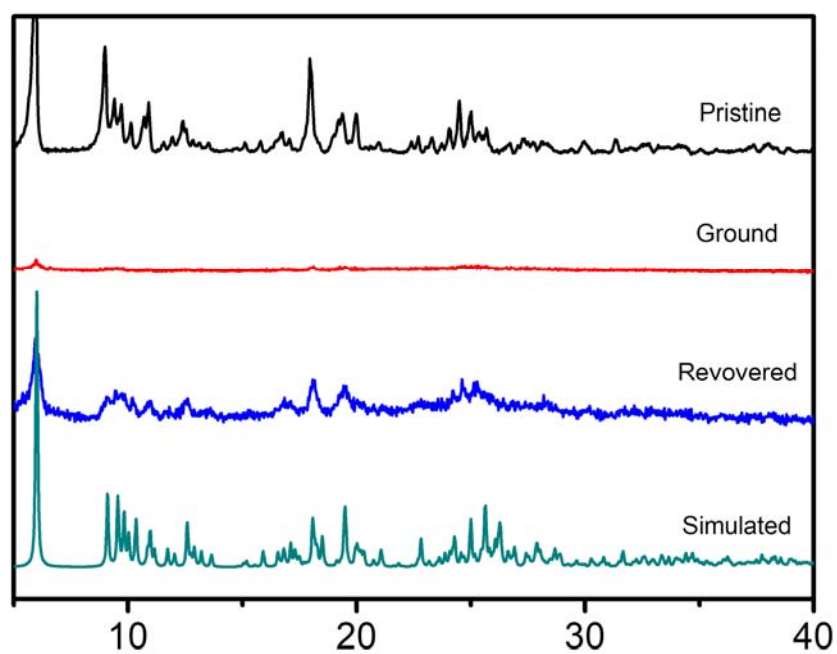

**Figure S5** XRD patterns of a) **5**, b) **7** and c) **8** in different forms.



a)

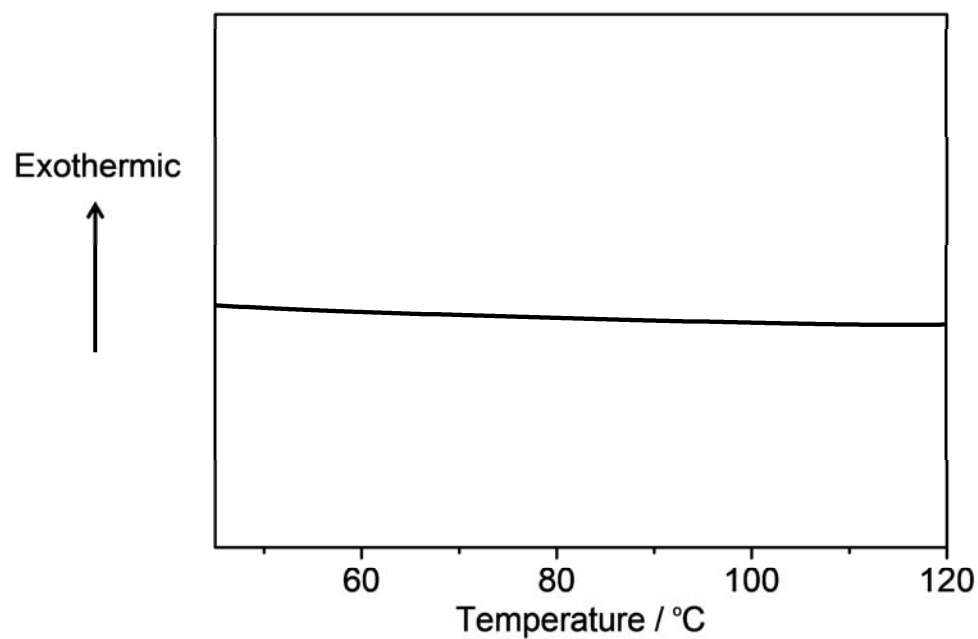

b)

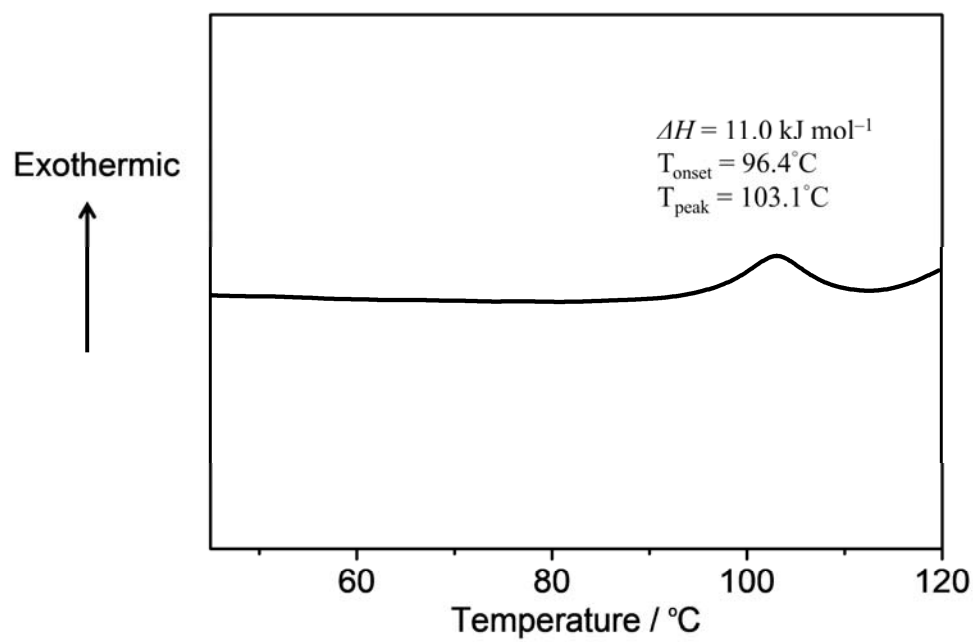

**Figure S6** Differential scanning calorimetry (DSC) trace of a) pristine solid sample of **8** at a heating rate of  $2.5^\circ\text{C min}^{-1}$  and b) ground solid sample of **8** at a heating rate of  $2.5^\circ\text{C min}^{-1}$ .

**Table S1** Crystal and structure determination data of **8**

|                                               |                                                                      |
|-----------------------------------------------|----------------------------------------------------------------------|
| Empirical formula                             | C <sub>40</sub> H <sub>26</sub> AuF <sub>3</sub> N <sub>2</sub>      |
| Formula weight                                | 788.59                                                               |
| Temperature, K                                | 100                                                                  |
| Wavelength, Å                                 | 0.71                                                                 |
| Crystal system                                | Triclinic                                                            |
| Space group                                   | $P\bar{1}$                                                           |
| $a$ , Å                                       | 10.6675(4)                                                           |
| $b$ , Å                                       | 10.7859(4)                                                           |
| $c$ , Å                                       | 29.4456(13)                                                          |
| $\alpha$ , deg                                | 87.957(1)                                                            |
| $\beta$ , deg                                 | 86.644(1)                                                            |
| $\gamma$ , deg                                | 64.109(1)                                                            |
| Volume, Å <sup>3</sup>                        | 3042.5(2)                                                            |
| $Z$                                           | 4                                                                    |
| Density (calcd), g cm <sup>-3</sup>           | 1.722                                                                |
| $F_{000}$                                     | 1544                                                                 |
| $\theta$ range for data collection, deg       | 3.4 to 29.9                                                          |
| Index ranges                                  | $-12 \leq h \leq 12$<br>$-12 \leq k \leq 12$<br>$-35 \leq l \leq 35$ |
| Reflections collected (unique)                | 75889/10772                                                          |
| Goodness-of-fit on $F^2$                      | 1.04                                                                 |
| Final R indices [ $I > 2\sigma(I)$ ]          | $R_1 = 0.041$ , $wR_2 = 0.057^a$                                     |
| Largest diff. peak and hole e Å <sup>-3</sup> | 1.10 and -1.05                                                       |

**Table S2** Selected bond distances (Å) and bond angles (°) of **8** with estimated standard deviations (esds) in parentheses

| Bond distances (Å) |          |
|--------------------|----------|
| Au(1)–C(8)         | 2.046(5) |
| Au(1)–C(25)        | 1.949(6) |
| Au(1)–C(33)        | 2.042(6) |
| Au(1)–N(1)         | 2.060(4) |
| C(25)–C(26)        | 1.195(8) |
| C(33)–C(34)        | 1.191(8) |

  

| Bond angles (°)   |          |
|-------------------|----------|
| C(8)–Au(1)–C(25)  | 92.1(2)  |
| C(8)–Au(1)–C(33)  | 174.9(2) |
| C(8)–Au(1)–N(1)   | 80.8(2)  |
| C(25)–Au(1)–C(33) | 93.0(2)  |
| C(25)–Au(1)–N(1)  | 172.8(2) |
| C(33)–Au(1)–N(1)  | 94.2(2)  |
| Au(1)–C(25)–C(26) | 174.1(5) |
| Au(1)–C(33)–C(34) | 171.9(5) |

**Table S3** Photophysical data of **6** in different solvents

| Compound | Medium          | Absorption                         | Emission                           | Stokes shift                                          |
|----------|-----------------|------------------------------------|------------------------------------|-------------------------------------------------------|
|          |                 | $\lambda_{\text{max}} / \text{nm}$ | $\lambda_{\text{max}} / \text{nm}$ | $\nu_{\text{abs}} - \nu_{\text{em}} / \text{cm}^{-1}$ |
| <b>6</b> | Cyclohexane     | 446                                | 505                                | 2620                                                  |
|          | Toluene         | 436                                | 548                                | 4690                                                  |
|          | Ethyl acetate   | 425                                | 655                                | 8260                                                  |
|          | THF             | 428                                | 670                                | 8440                                                  |
|          | Dichloromethane | 436                                | 680                                | 8230                                                  |
